# Supplementary material for: Circularly polarized blue fluorescence based on chiral heteroleptic six-coordinate bis-pyrazolonate-Zn2+ complexes
Source: Royal Society of Chemistry journal article supplement (doi:10.1039/d4dt00086b), 2024-01-01
Supplement: d4dt00086b1.pdf [file d4dt00086b1.pdf]

**Supporting Information For**

**Circularly polarized blue fluorescence based on chiral heteroleptic six-coordinate *bis*-pyrazolonate-Zn<sup>2+</sup> complexes**

Jiaxiang Liu,<sup>a</sup> Yuzhen Zhao,<sup>a</sup> Zhe Zhang,<sup>a</sup> Manni Li,<sup>a</sup> Wenqi Song,<sup>a</sup> Wentao Li,<sup>\*b</sup> and Zongcheng Miao<sup>\*c</sup>

<sup>a</sup>*Xi'an Key Laboratory of Advanced Photo-Electronics Materials and Energy Conversion Device, Technological Institute of Materials & Energy Science (TIMES), Xijing University, Xi'an 710123, P.R. China.*

<sup>b</sup>*College of Big Data and Information Engineering, Institute of Advanced Optoelectronic Materials and Technology, Guizhou University, Guiyang 550025, P.R. China.*

<sup>c</sup>*School of Artificial Intelligence, Optics and Electronics (iOPEN), Northwestern Polytechnical University, Xi'an 710072, P. R. China.*

To whom correspondence should be addressed.

Email address: [wqli@gzu.edu.cn](mailto:wqli@gzu.edu.cn) (Wentao Li); [miaozongcheng@nwpu.edu.cn](mailto:miaozongcheng@nwpu.edu.cn) (Zongcheng Miao)

### **Spectroscopic Measurements.**

**Structural Measurements.** The C, H, and N microanalyses were carried out with an elemental analyzer (Elementar vario EL, Germany). Fourier transform infrared (FTIR) spectra were obtained using an infrared spectrometer (Bruker, INVENIO, Germany). The nuclear magnetic resonance hydrogen spectra ( $^1\text{H}$  NMR) were recorded with a JEOL JNM-ECZ400S nuclear magnetic resonance spectrometer (Japan Electronics Corporation, 400 MHz) in  $\text{CDCl}_3$  at room temperature, and the tetramethylsilane (TMS) was used as an internal standard.  $^1\text{H}$  NMR spectra assignments are reported as follows: s = singlet, d = doublet, t = triplet, m = multiplet. MALDI-TOF mass spectra were recorded on an Applied Biosystems 4800 Plus MALDI-TOF/TOF Analyzer (Applied Biosystems). A suitable single crystal of **S,S-Zn<sup>2+</sup>** was obtained by recrystallization from absolute methanol. The crystal data of **S,S-Zn<sup>2+</sup>** were collected on a Bruker APEX-II CCD diffractometer with Ga-K $\alpha$  radiation ( $\lambda = 1.34139 \text{ \AA}$ ) at 200 K. The structures were solved by the direct method SHELXS and then refined using the full-matrix least-squares method, i.e., SHELXL-2015, implemented in the OLEX2 package.<sup>1</sup> All non-hydrogen atoms were refined anisotropically, while the hydrogen atoms were refined isotropically. The absolute configuration of **S,S-Zn<sup>2+</sup>** was conclusively established using anomalous scattering of Ga-K $\alpha$  radiation with Flack parameter = 0.05(3). More details concerned with constraints and the refinements have been supplied in the cif files, and crystallographic data and selected bond lengths ( $\text{\AA}$ ) and angles ( $^\circ$ ) are presented in **Tables S2-S3**, respectively. Crystallographic data of **S,S-Zn<sup>2+</sup>** have been deposited in the Cambridge Crystallographic Data Centre (CCDC) with the CCDC number of 2300136.

**Optical Measurements.** UV-vis absorption spectra were recorded on a PerkinElmer LAMBDA

950 UV-Vis spectrophotometer (PerkinElmer, Waltham, MA, USA), and the experimental HOMO–LUMO energy gaps of the two chiral Zn<sup>2+</sup> enantiomers (***R,R***-Zn<sup>2+</sup> and ***S,S***-Zn<sup>2+</sup>) were calculated by the UV-vis edge absorption ( $\lambda_{\text{abs}} = 333\text{-}334$  nm). Excitation and emission spectra were recorded using an FLS 1000 spectrofluorometer (Edinburgh Instruments, UK). Luminescence lifetimes were recorded on the FLS 980 (Edinburgh Instruments, England) transient fluorescence spectrometer (Edinburgh Instruments, England). Photoluminescence quantum yields ( $\Phi_{\text{PL}}$ ) were determined using a FLS 980 absolute photoluminescence quantum yield measurement system and integrating sphere as a sample chamber. Circular dichroism (CD) spectra were measured on a ChiraScan CD spectrometer (Applied Photophysics, UK). The CPL spectra were measured on a Jasco CPL-300 spectrophotometer based on ‘Continuous’ scanning mode at 100 nm/min scan speed. The test mode adopts “Slit” mode with the Ex and Em slit width 2500  $\mu\text{m}$  and the digital integration time (D.I.T.) is 2.0 s with multiple accumulations (3 times) and their  $g_{\text{PL}}$  values were read from the curves recorded with the software bundled on the equipment. The Commission Internationale de L’Eclairage (CIE) coordinate of the complexes ***R,R***-Zn<sup>2+</sup> and ***S,S***-Zn<sup>2+</sup> were calculated by the International Commission on Illumination (CIE) system.

**Thermodynamic Measurements.** Thermogravimetric (TG) analysis was performed using a Q500 thermogravimetric analyzer (TA instruments, USA) at a heating speed of 10 °C/min in a nitrogen gas atmosphere.

**Electrochemical Measurements.** Cyclic voltammetry measurements were conducted on an Autolab PGSTAT302N in degassed MeCN solution at room temperature under a N<sub>2</sub> atmosphere (scan rate = 100 mV/s).

**DFT and TD-DFT Theoretical Calculations.** To further interpret the UV-vis spectral behaviour of the two chiral Zn<sup>2+</sup> enantiomers *R,R*-Zn<sup>2+</sup> and *S,S*-Zn<sup>2+</sup>, the original computational models of *R,R*-Zn<sup>2+</sup> and *S,S*-Zn<sup>2+</sup> were built on the basis of the crystal structure (*S,S*-Zn<sup>2+</sup>). Their minimum energy structures based on the ground-state (S<sub>0</sub>) were obtained from density functional theory (DFT) calculations which were carried out employing the popular B3LYP functional theory in Gaussian 09.<sup>2</sup> The 6-31G (d, p) basis set<sup>3</sup> was employed for C, H, O and N atoms, whereas the LANL2DZ basis set, together with the related effective core potentials 94, was used for Zn atoms.<sup>4</sup> After that, their time-dependent DFT (TD-DFT) calculations were performed to explore energy transitions. Excited states are categorized into single/triple ligand-to-ligand, intra-ligand, ligand-to-metal or metal-to-ligand charge transfer states (LLCT, ILCT, LMCT or MLCT) by the interfragment charge transfer (IFCT) analysis.

***Preparation and characterization of the pyrazolone ligand HPMBP (1-phenyl-3-methyl-4-benzoyl-5-pyrazolone)***

The pyrazolone ligand, **HPMBP**, was synthesized according to a modified procedure described in the literature.<sup>5</sup> In more detail, 1-phenyl-3-methyl-5-pyrazolone (**PMP**; 7.5 g, 43.1 mmol) was added to 1,4-dioxane (35 mL) and heated until the solid was completely dissolved. After the solution cooled slightly, Ca(OH)<sub>2</sub> (6.0 g, 81.1 mmol) was added to the reaction system, which was further stirred for 10 min. Subsequently, benzoyl chloride (5.86 mL, 55.0 mmol) was added dropwise over 5 min, and the reaction mixture was refluxed for 18 h and thereafter cooled to 25 °C. Ice-cold hydrochloric acid (15 mL, 12 mol/L) was added to the mixture, followed by 176 mL of distilled water. The brownish-red precipitate was filtered and purified by

recrystallization from CH<sub>3</sub>OH and H<sub>2</sub>O to give the light-yellow microcrystalline products. The target ligand was prepared *via* the synthetic route presented in **Scheme 1**. The analysis data for **HPMBP**: Yield = 10.5 g, 88%. Anal. Calcd for C<sub>17</sub>H<sub>14</sub>N<sub>2</sub>O<sub>2</sub>: C, 73.37; H, 5.07; N, 10.07%. Found: C, 73.42; H, 5.14; N, 10.03%. FTIR (KBr, cm<sup>-1</sup>): 3448 (w), 3061 (w), 3043 (w), 2893 (w), 2581 (m), 1646 (vs), 1598 (m), 1578 (m), 1533 (s), 1497 (s), 1458 (m), 1399 (m), 1349 (s), 1310 (m), 1196 (w), 1107 (w), 1074 (w), 1024 (w), 949 (w), 932 (w), 832 (m), 798 (w), 755 (m), 727 (w), 706 (w), 687 (w), 670 (w), 610 (w), 532 (w). <sup>1</sup>H NMR (CDCl<sub>3</sub>, 400 MHz): δ (ppm) 7.80 (d, 2H, -Ph), 7.57 (d, 2H, -Ph), 7.50 (t, 1H, -Ph), 7.45 (d, 2H, -Ph), 7.40 (t, 2H, -Ph), 7.24 (t, 1H, -Ph), 7.19 (s, 1H, -H of five-membered rings), 2.03 (s, 3H, -CH<sub>3</sub>).

#### ***Synthesis and characterization of the Zn<sup>2+</sup> precursor complex [Zn(PMBP)<sub>2</sub>(CH<sub>3</sub>OH)<sub>2</sub>]***

To a stirred solution of **HPMBP** (0.056 g, 0.2 mmol) in 10 mL absolute CH<sub>3</sub>OH, solid Zn(OAc)<sub>2</sub>·2H<sub>2</sub>O (0.022 g, 0.1 mmol) was added. After two minutes, a white precipitate appeared in the solution, and the resulting mixture was stirred for 4 h at 60 °C. Then, the colorless insoluble product was filtered and washed two times with absolute CH<sub>3</sub>OH and H<sub>2</sub>O. The crude product was recrystallized from CH<sub>3</sub>OH to obtain a pure compound. The analysis data for **[Zn(PMBP)<sub>2</sub>(CH<sub>3</sub>OH)<sub>2</sub>]**: Yield = 0.058 g, 85%. Anal. Calcd for C<sub>36</sub>H<sub>34</sub>N<sub>4</sub>O<sub>6</sub>Zn: C, 63.21; H, 5.01; N, 8.19%. Found: C, 63.15; H, 5.12; N, 8.24%. FTIR (KBr, cm<sup>-1</sup>): 3429 (w), 3211 (w), 3062 (w), 2930 (w), 1610 (vs), 1595 (s), 1577 (s), 1531 (m), 1485 (vs), 1434 (s), 1401 (m), 1371 (m), 1235 (w), 1157 (w), 1135 (w), 1062 (m), 1025 (m), 1000 (w), 951 (m), 909 (w), 840 (w), 795 (w), 764 (m), 736 (m), 702 (w), 660 (w), 641 (w), 613 (m), 553 (w), 511 (w). <sup>1</sup>H NMR (CDCl<sub>3</sub>, 400 MHz): δ (ppm) 7.73 (d, 4H, -Ph), 7.42 (m, 2H, -Ph), 7.34 (d, 8H, -Ph), 7.18 (t, 4H, -Ph), 7.05 (t, 2H, -Ph), 3.44 (s, 6H, -CH<sub>3</sub> of CH<sub>3</sub>OH), 1.73 (s, 6H, -CH<sub>3</sub>), 1.37 (1H, d, -OH for CH<sub>3</sub>OH).

**Figure S1.** 400 MHz  $^1\text{H}$  NMR spectra of the free ligands (**1S,2S-Chxn** and **HPMBP**) and the chiral complex **S,S-Zn $^{2+}$**  in  $\text{CDCl}_3$  at room temperature.

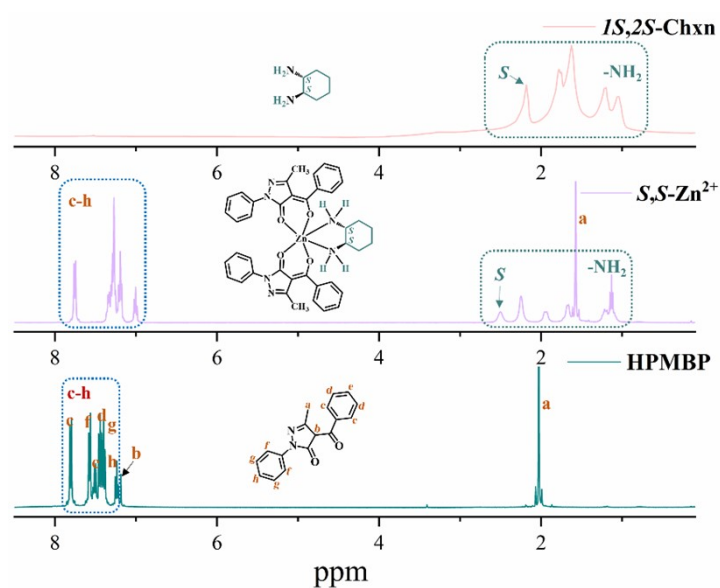

**Figure S2.** The octahedral coordination geometry of  $\text{Zn}^{2+}$  ion for complex **S,S-Zn $^{2+}$**  (maroon: oxygen, dark blue: nitrogen, magenta: zinc).

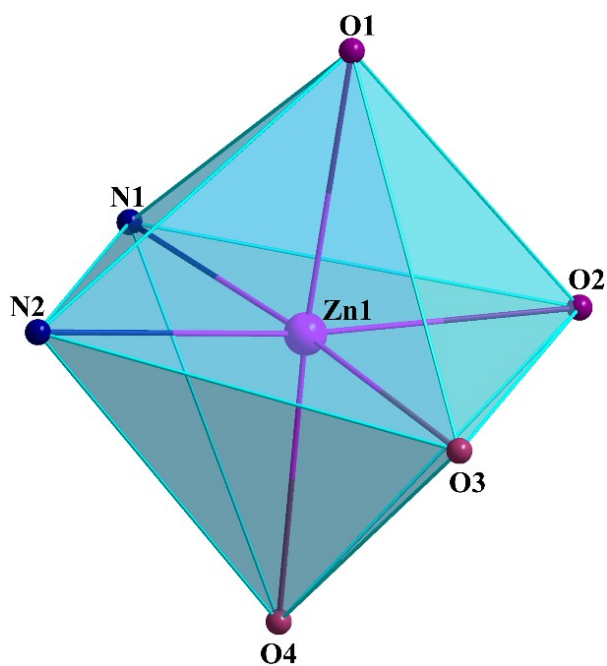

**Figure S3.** Thermogravimetric (TG) curves of the two chiral Zn<sup>2+</sup> enantiomers (*R,R*-Zn<sup>2+</sup> and *S,S*-Zn<sup>2+</sup>).

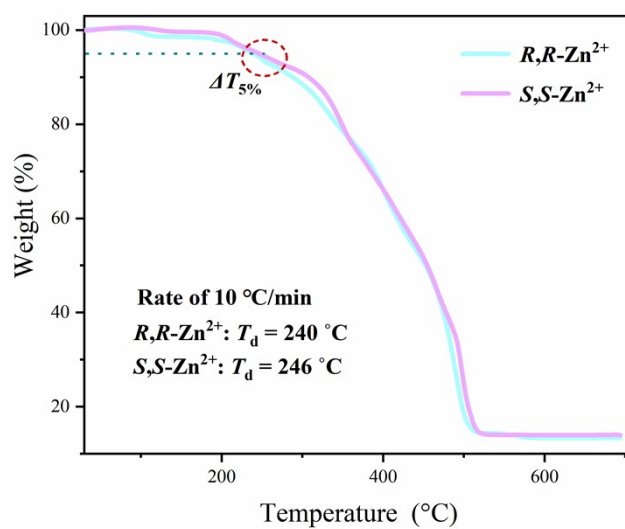

**Figure S4.** Normalized UV–vis absorption spectra of the chiral 1,2-diamine ligands (*1R,2R*-Chxn and *1S,2S*-Chxn) and pyrazolone ligand **HPMBP** in CH<sub>2</sub>Cl<sub>2</sub> ( $1 \times 10^{-5}$  M) at room temperature.

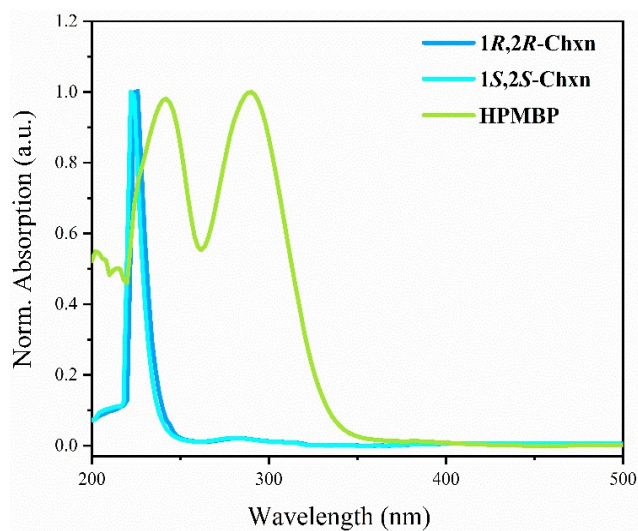

**Figure S5.** (a) Excitation spectra of the two chiral Zn<sup>2+</sup> enantiomers (*R,R*-Zn<sup>2+</sup> and *S,S*-Zn<sup>2+</sup>) recorded by monitoring the emissions at *ca.* 460 nm in CH<sub>2</sub>Cl<sub>2</sub> (1 × 10<sup>-5</sup> M); (b) Photoluminescence color coordinates on the CIE chromaticity diagram of the two chiral Zn<sup>2+</sup> enantiomers (*R,R*-Zn<sup>2+</sup> and *S,S*-Zn<sup>2+</sup>).

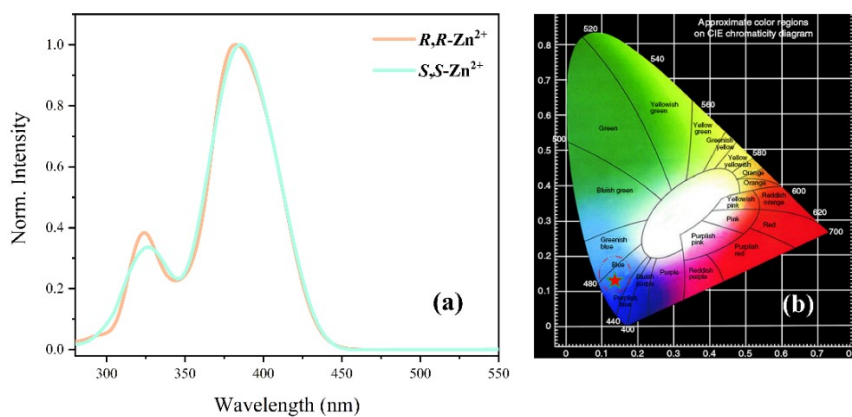

**Figure S6.** Room temperature decay curves of the two chiral Zn<sup>2+</sup> enantiomers (*R,R*-Zn<sup>2+</sup> and *S,S*-Zn<sup>2+</sup>) in CH<sub>2</sub>Cl<sub>2</sub> (1×10<sup>-5</sup> M) monitored at *ca.* 460 nm.

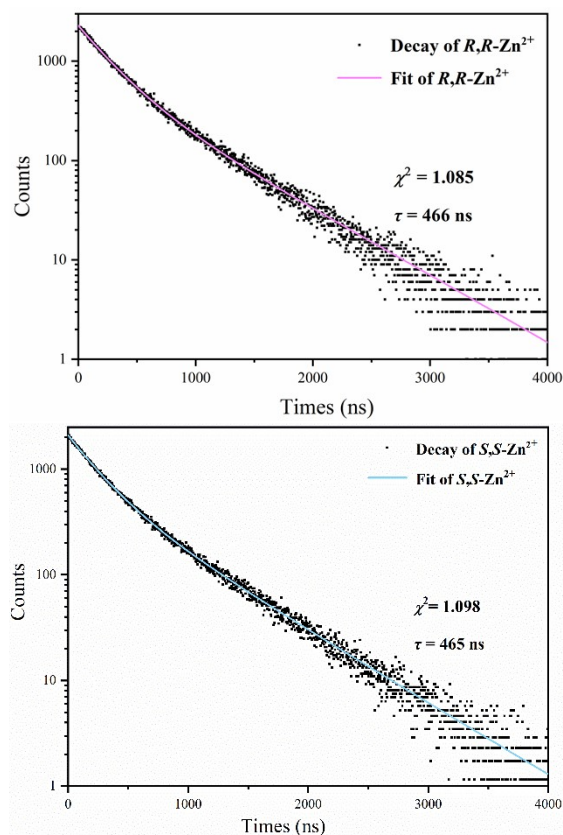



**Figure S7.** CD spectra of the chiral 1,2-diamine ligands (**1R,2R-Chxn** and **1S,2S-Chxn**) in CH<sub>2</sub>Cl<sub>2</sub>

( $1 \times 10^{-5}$  M) at room temperature.

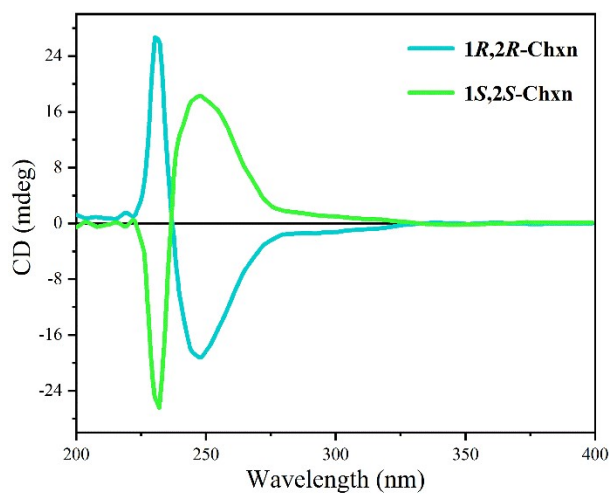

**Figure S8.** The  $g_{\text{lum}}$  curves of the two chiral Zn<sup>2+</sup> enantiomers (**R,R-Zn<sup>2+</sup>** and **S,S-Zn<sup>2+</sup>**) in CH<sub>2</sub>Cl<sub>2</sub>

( $1 \times 10^{-5}$  M).

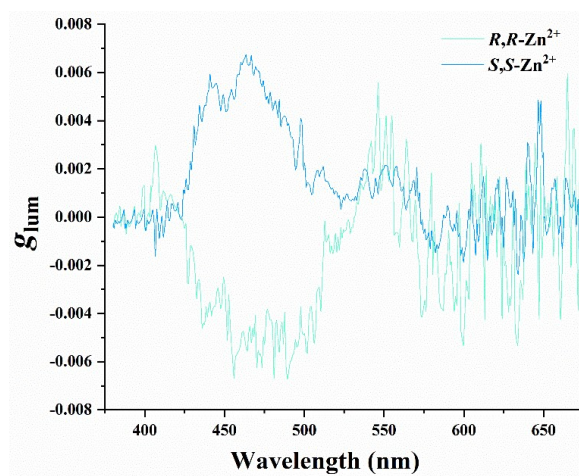

**Figure S9.** The CV curves of the two chiral Zn<sup>2+</sup> enantiomers (*R,R*-Zn<sup>2+</sup> and *S,S*-Zn<sup>2+</sup>) recorded versus Fc<sup>+</sup>/Fc in degassed MeCN solution at room temperature under a N<sub>2</sub> atmosphere (scan rate = 100 mV/s).

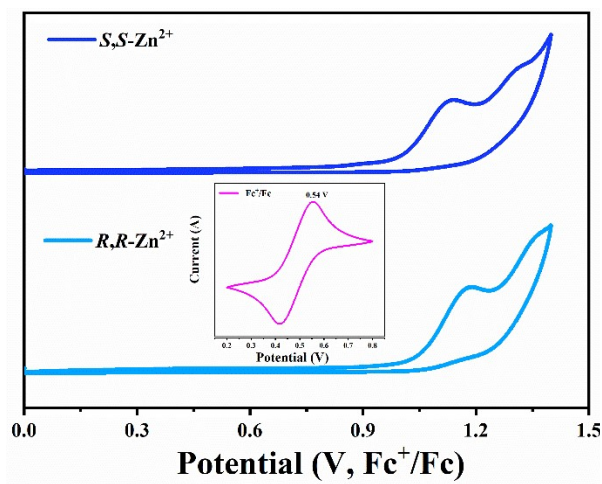

**Table S1.** The comparison of the CPL performance between this work and other reported homoleptic Schiff/2,2'-bipyridyl-base Zn<sup>2+</sup> complexes.

| Compound                                                                                                                                                | $\lambda_{\text{PL}}^{\text{max}}$<br>(nm) | $\tau$                  | $\Phi_{\text{PL}}$<br>(%) | $ g_{\text{PL}} $    | reference                                             |
|---------------------------------------------------------------------------------------------------------------------------------------------------------|--------------------------------------------|-------------------------|---------------------------|----------------------|-------------------------------------------------------|
| <br>[Zn(PMBP) <sub>2</sub> (Chiral-Chxn)]                              | 458-460                                    | 225-254 ns              | 9-10                      | 0.0065-<br>0.0068    | This work                                             |
| <br>R/S-ZnL                                                            | 491                                        | 7.39-8.42 $\mu\text{s}$ | 14.8                      | $3.0 \times 10^{-3}$ | <i>Mater. Chem. Front.</i> , 2019, <b>3</b> , 867-873 |
| <br>ZnL <sub>1</sub>                                                  | 462                                        | /                       | 25                        | $7.7 \times 10^{-4}$ | <i>Chem. Commun.</i> , 2022, <b>58</b> , 7503-7506    |
| <br>ZnL <sub>2</sub>                                                 | 469                                        | /                       | 17                        | $3.2 \times 10^{-3}$ |                                                       |
| <br>[Chiral-ZnLBy(H <sub>2</sub> O)(NO <sub>2</sub> ) <sub>2</sub> ] | 490                                        | /                       | /                         | $2.5 \times 10^{-3}$ | <i>Dalton Trans.</i> , 2023, <b>52</b> , 7646-7651    |
| <br>Zn(+-)-10Ph-1                                                    | 470                                        | 74 ns                   | 10.8                      | $2.4 \times 10^{-3}$ | <i>J. Am. Chem. Soc.</i> , 2007, <b>129</b> , 210-217 |

**Table S2.** Crystal diffraction data and refinement statistics for the chiral Zn<sup>2+</sup> complex[Zn(PMBP)<sub>2</sub>(1*S*,2*S*-Chxn)] (*S,S*-Zn<sup>2+</sup>).

| Compound                                                     | <i>S,S</i> -Zn <sup>2+</sup> ·CH <sub>3</sub> OH                  |
|--------------------------------------------------------------|-------------------------------------------------------------------|
| CCDC                                                         | 2300136                                                           |
| Empirical formula                                            | C <sub>41</sub> H <sub>44</sub> N <sub>6</sub> O <sub>5</sub> Zn  |
| Formula weight                                               | 766.19                                                            |
| Crystal system                                               | triclinic                                                         |
| Space group                                                  | <i>P</i> 1                                                        |
| <i>a</i> /Å                                                  | 11.4625(6)                                                        |
| <i>b</i> /Å                                                  | 13.1925(7)                                                        |
| <i>c</i> /Å                                                  | 14.4678(7)                                                        |
| $\alpha$ /°                                                  | 67.905(2)                                                         |
| $\beta$ /°                                                   | 83.474(2)                                                         |
| $\gamma$ /°                                                  | 70.309(2)                                                         |
| <i>V</i> /Å <sup>3</sup>                                     | 1908.38(17)                                                       |
| <i>Z</i>                                                     | 2                                                                 |
| $\rho$ /g·cm <sup>-3</sup>                                   | 1.333                                                             |
| Crystal size/mm                                              | 0.21 × 0.18 × 0.17                                                |
| $\mu$ (Mo/Ga-K $\alpha$ )/mm <sup>-1</sup>                   | 0.858                                                             |
| Data/restraints/parameters                                   | 14292/3/964                                                       |
| Quality-of-fit indicator                                     | 1.073                                                             |
| No. unique reflections                                       | 14292                                                             |
| No. observed reflections                                     | 49066                                                             |
| Final <i>R</i> indices [ <i>I</i> > 2 $\sigma$ ( <i>I</i> )] | <i>R</i> <sub>1</sub> = 0.0385<br><i>wR</i> <sub>2</sub> = 0.0968 |
| <i>R</i> indices (all data)                                  | <i>R</i> <sub>1</sub> = 0.0491<br><i>wR</i> <sub>2</sub> = 0.1016 |
| Flack parameter                                              | 0.05(3)                                                           |

**Table S3.** Selected bond lengths (Å) and angles (°) for [Zn(PMBP)<sub>2</sub>(1*S*,2*S*-Chxn)]·CH<sub>3</sub>OH (***S,S***-Zn<sup>2+</sup>·CH<sub>3</sub>OH).

| Compound        | <b><i>S,S</i></b> -Zn <sup>2+</sup> ·CH <sub>3</sub> OH |
|-----------------|---------------------------------------------------------|
| Zn(1)-O(1)      | 2.093(3)                                                |
| Zn(1)-O(2)      | 2.144(4)                                                |
| Zn(1)-O(3)      | 2.113(3)                                                |
| Zn(1)-O(4)      | 2.093(4)                                                |
| Zn(1)-N(1)      | 2.130(5)                                                |
| Zn(1)-N(2)      | 2.107(5)                                                |
| O(1)-Zn(1)-O(2) | 87.14(14)                                               |
| O(3)-Zn(1)-O(4) | 87.32(15)                                               |
| N(1)-Zn(1)-N(2) | 82.33(19)                                               |

**Table S4.** Frontier orbitals and their corresponding electron cloud density distributions for the two chiral Zn<sup>2+</sup> enantiomers (*R,R*-Zn<sup>2+</sup> and *S,S*-Zn<sup>2+</sup>) on the basis of optimized S<sub>0</sub> geometries.

| Complex                      | Orbital | Contribution of metal d <sub>π</sub> orbitals and π orbitals of ligand to MOs (%) |          |          |             |
|------------------------------|---------|-----------------------------------------------------------------------------------|----------|----------|-------------|
|                              |         | Zn                                                                                | (PMBP)-1 | (PMBP)-2 | Chiral-Chxn |
| <i>R,R</i> -Zn <sup>2+</sup> | LUMO+2  | 0.43                                                                              | 0.03     | 99.47    | 0.07        |
|                              | LUMO+1  | 0.45                                                                              | 97.39    | 2.02     | 0.15        |
|                              | LUMO    | 0.47                                                                              | 1.93     | 97.49    | 0.11        |
|                              | HOMO    | 0.49                                                                              | 1.77     | 97.60    | 0.14        |
|                              | HOMO-1  | 0.57                                                                              | 97.45    | 1.67     | 0.31        |
|                              | HOMO-2  | 0.21                                                                              | 0.28     | 99.25    | 0.25        |
| <i>S,S</i> -Zn <sup>2+</sup> | LUMO+2  | 0.47                                                                              | 0.03     | 99.45    | 0.05        |
|                              | LUMO+1  | 0.45                                                                              | 97.60    | 1.83     | 0.13        |
|                              | LUMO    | 0.41                                                                              | 1.75     | 97.63    | 0.21        |
|                              | HOMO    | 0.51                                                                              | 2.47     | 96.89    | 0.13        |
|                              | HOMO-1  | 0.54                                                                              | 96.79    | 2.36     | 0.30        |
|                              | HOMO-2  | 0.19                                                                              | 0.29     | 99.21    | 0.30        |

**Table S5.** Electronic excitation energy and their corresponding transition types and properties

for the two chiral Zn<sup>2+</sup> enantiomers (*R,R*-Zn<sup>2+</sup> and *S,S*-Zn<sup>2+</sup>) by the IFCT analysis of TD-DFT calculations

| Complex                        | State                          | $\lambda$<br>(nm) | $E$ (eV) | Oscillator<br>$f$               | transition<br>(% contrib.) | Assignment<br>(%)        |                         |
|--------------------------------|--------------------------------|-------------------|----------|---------------------------------|----------------------------|--------------------------|-------------------------|
| <i>R,R</i> -Zn <sup>2+</sup>   | S <sub>0</sub> →S <sub>1</sub> | 361               | 3.4310   | 0.0122                          | H→L (95.91);               | <sup>1</sup> ILCT: 95.18 | <sup>1</sup> LLCT: 3.85 |
|                                |                                |                   |          |                                 |                            | <sup>1</sup> MLCT: 0.49  | <sup>1</sup> LMCT: 0.47 |
|                                | S <sub>0</sub> →S <sub>2</sub> | 352               | 3.5196   | 0.0016                          | H→L+1 (96.03);             | <sup>1</sup> LLCT: 95.37 | <sup>1</sup> ILCT: 3.70 |
|                                |                                |                   |          |                                 |                            | <sup>1</sup> MLCT: 0.49  | <sup>1</sup> LMCT: 0.45 |
|                                | S <sub>0</sub> →S <sub>3</sub> | 348               | 3.5612   | 0.0272                          | H-1→L+1 (89.25);           | <sup>1</sup> LLCT: 97.92 | <sup>1</sup> ILCT: 3.17 |
|                                |                                |                   |          |                                 | H-1→L (5.40);              | <sup>1</sup> MLCT: 0.57  | <sup>1</sup> LMCT: 0.53 |
| S <sub>0</sub> →T <sub>1</sub> | 456                            | 2.7152            | 0.0000   | H→L (62.66);                    | <sup>3</sup> ILCT: 95.14   | <sup>3</sup> LLCT: 3.74  |                         |
|                                |                                |                   |          | H-2→L (27.32);<br>H→L+5 (2.24); | <sup>3</sup> LMCT: 0.46    | <sup>3</sup> MLCT: 0.66  |                         |
| <i>S,S</i> -Zn <sup>2+</sup>   | S <sub>0</sub> →S <sub>1</sub> | 362               | 3.4221   | 0.0124                          | H→L (95.95);               | <sup>1</sup> ILCT: 96.64 | <sup>1</sup> LLCT: 4.46 |
|                                |                                |                   |          |                                 |                            | <sup>1</sup> MLCT: 0.51  | <sup>1</sup> LMCT: 0.41 |
|                                | S <sub>0</sub> →S <sub>2</sub> | 352               | 3.5188   | 0.0019                          | H→L+1 (93.85);             | <sup>1</sup> LLCT: 95.22 | <sup>1</sup> ILCT: 4.18 |
|                                |                                |                   |          |                                 | H-1→L+1 (3.85);            | <sup>1</sup> MLCT: 0.33  | <sup>1</sup> LMCT: 0.27 |
|                                | S <sub>0</sub> →S <sub>3</sub> | 349               | 3.5483   | 0.0215                          | H-1→L+1 (86.27);           | <sup>1</sup> LLCT: 96.65 | <sup>1</sup> ILCT: 2.59 |
|                                |                                |                   |          |                                 | H-1→L (6.08);              | <sup>1</sup> MLCT: 0.47  | <sup>1</sup> LMCT: 0.29 |
| S <sub>0</sub> →T <sub>1</sub> | 457                            | 2.7106            | 0.0000   | H→L (62.28);                    | <sup>3</sup> ILCT: 94.79   | <sup>3</sup> LLCT: 4.18  |                         |
|                                |                                |                   |          | H-2→L (27.47);<br>H→L+5 (2.27); | <sup>3</sup> MLCT: 0.65    | <sup>3</sup> LMCT: 0.38  |                         |

### Supplementary References

1. O. V. Dolomanov, L. J. Bourhis, R. J. Gildea, J. A. Howard and H. Puschmann, *J. Appl. Crystallogr.*, 2009, **42**, 339-341.
2. S. Shen, W. Wang, Z. Chen, H. Zhang, Y. Yang, X. Wang, P. Fu and B. Han, *Mar. Drugs*, 2021, **19**, 630.
3. R. Krishnan, J. S. Binkley, R. Seeger and J. A. Pople, *J. Chem. Phys.*, 1980, **72**, 650-654.
4. P. J. Hay and W. R. Wadt, *J. Chem. Phys.*, 1985, **82**, 270-283.
5. X. Zhang, L. Hu, X. Wang, Y. Zhao and X. Chen, *Inorg. Chim. Acta*, 2023, 121618.
